# Supplementary material for: Impact of Overweight and Obesity on US Papillary Thyroid Cancer Incidence Trends (1995–2015)
Source: PubMed Central journal article supplement — J Natl Cancer Inst. 2019 Dec 5;112(8):810–7. doi: 10.1093/jnci/djz202 (PMC7825478; doi:10.1093/jnci/djz202), 2019-12-05
Supplement: djz202_supplementary_data.pdf [file djz202_supplementary_data.pdf]

SUPPLEMENTARY MATERIALS

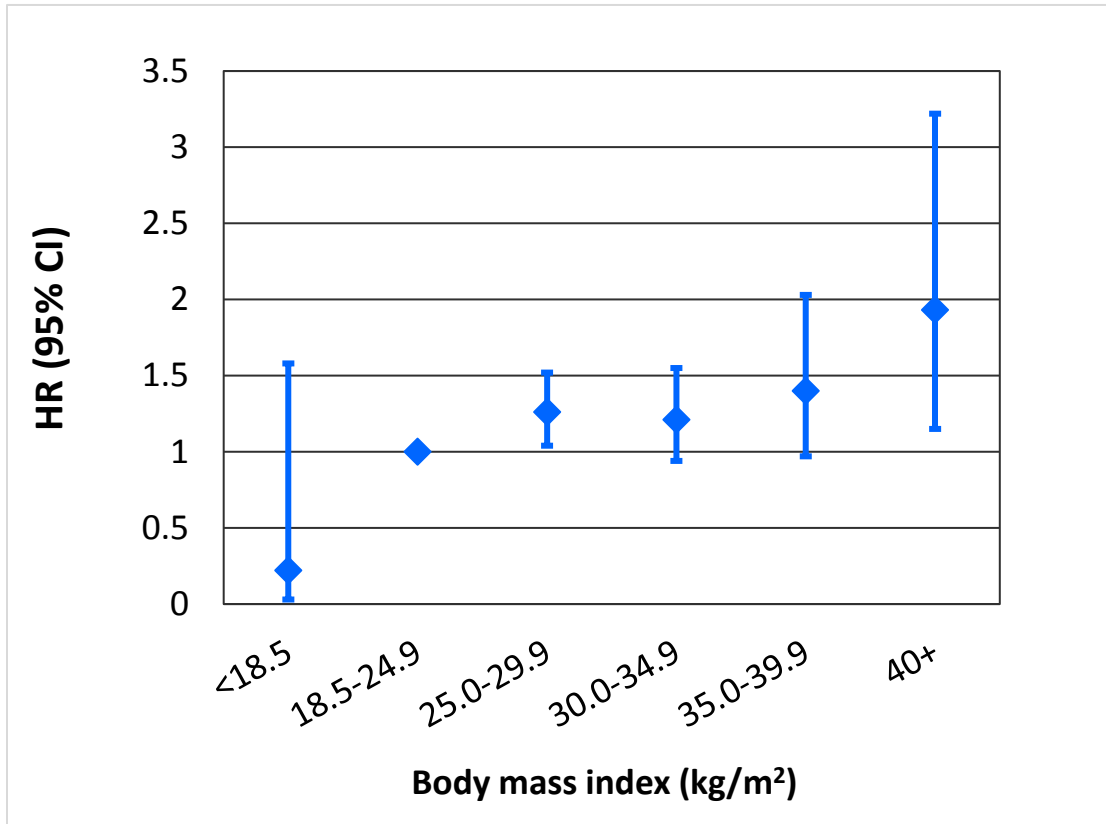

**Supplementary Figure 1. Hazard ratios (HRs) and 95% confidence intervals (CIs) for papillary thyroid cancer, according to expanded baseline categories of body mass index, the NIH-AARP Diet and Health Study (1995-2011).** Models used attained age as the time metric and were adjusted for sex, race/ethnicity (non-Hispanic white, non-Hispanic black, Hispanic, other specified, unknown), education (college graduate or not, unknown), number of drinks of alcohol per week (continuous), and cigarette smoking status (never, former, current).

**Supplementary Table 1. Sex-specific hazard ratios (HRs)\* and 95% confidence intervals (CIs) for papillary thyroid cancer, overall and by stage and tumor size, according to baseline categories of body mass index, the NIH-AARP Diet and Health Study (1995-2011).**

| Diagnostic characteristic | No. cases | Body mass index, kg/m <sup>2</sup> |                  |                   |                   |
|---------------------------|-----------|------------------------------------|------------------|-------------------|-------------------|
|                           |           | <18.5                              | 18.5-24.9        | 25.0-29.9         | 30.0+             |
| <b>Men</b>                |           |                                    |                  |                   |                   |
| Total                     | 248       | ---                                | 1.00 (Reference) | 1.46 (1.06, 2.01) | 1.73 (1.19, 2.50) |
| Stage                     |           |                                    |                  |                   |                   |
| Localized                 | 155       | ---                                | 1.00 (Reference) | 1.58 (1.06, 2.36) | 1.59 (0.98, 2.58) |
| Regional/distant          | 87        | ---                                | 1.00 (Reference) | 1.35 (0.78, 2.32) | 2.03 (1.11, 3.71) |
| Tumor size, cm            |           |                                    |                  |                   |                   |
| ≤1                        | 58        | ---                                | 1.00 (Reference) | 1.68 (0.87, 3.26) | 1.76 (0.80, 3.88) |
| 1.1-2.0                   | 39        | ---                                | 1.00 (Reference) | 0.53 (0.25, 1.14) | 1.26 (0.58, 2.75) |
| 2.1-4.0                   | 35        | ---                                | 1.00 (Reference) | 2.81 (1.07, 7.35) | 1.34 (0.38, 4.67) |
| >4.0                      | 34        | ---                                | 1.00 (Reference) | 4.31 (1.26, 14.7) | 7.62 (2.11, 27.5) |
| <b>Women</b>              |           |                                    |                  |                   |                   |
| Total                     | 356       | 0.25 (0.04, 1.81)                  | 1.00 (Reference) | 1.17 (0.92, 1.48) | 1.08 (0.82, 1.43) |
| Stage                     |           |                                    |                  |                   |                   |
| Localized                 | 277       | 0.34 (0.05, 2.41)                  | 1.00 (Reference) | 1.11 (0.84, 1.46) | 1.17 (0.86, 1.59) |
| Regional/distant          | 66        | ---                                | 1.00 (Reference) | 1.36 (0.80, 2.31) | 0.79 (0.39, 1.61) |
| Tumor size, cm            |           |                                    |                  |                   |                   |
| ≤1                        | 127       | ---                                | 1.00 (Reference) | 1.16 (0.78, 1.73) | 1.03 (0.65, 1.64) |
| 1.1-2.0                   | 59        | ---                                | 1.00 (Reference) | 0.99 (0.55, 1.78) | 0.93 (0.47, 1.84) |
| 2.1-4.0                   | 51        | ---                                | 1.00 (Reference) | 0.95 (0.50, 1.79) | 0.96 (0.47, 1.97) |
| >4.0                      | 16        | ---                                | 1.00 (Reference) | 1.65 (0.44, 6.18) | 3.58 (1.02, 12.5) |

\* Models used attained age as the time metric and were adjusted for sex, race/ethnicity (non-Hispanic white, non-Hispanic black, Hispanic, other specified, unknown), education (college graduate or not, unknown), number of drinks of alcohol per week (continuous), and cigarette smoking status (never, former, current).
